# Supplementary material for: Films Based on Thermoplastic Starch Blended with Pine Resin Derivatives for Food Packaging
Source: MDPI journal article supplement (doi:10.3390/foods10061171), 2021-05-23
Supplement: s1 [file s1]

# Films based on thermoplastic starch blended with pine resin derivatives for food packaging

## Supporting Information

Cristina Pavon<sup>1,\*</sup>, Miguel Aldas<sup>1,2</sup>, Juan López-Martínez<sup>1</sup>, Joaquín Hernández- Fernández<sup>3,4</sup>, Marina Patricia Arrieta<sup>5,6</sup>

- <sup>1</sup> Instituto de Tecnología de Materiales (ITM), Universitat Politècnica de València (UPV), 03801 Alcoy, Spain; jlopezm@mcm.upv.es (J.L.-M.)
  - <sup>2</sup> Departamento de Ciencia de Alimentos y Biotecnología, Facultad de Ingeniería Química y Agroindustria, Escuela Politécnica Nacional, 170517 Quito, Ecuador; miguel.aldas@epn.edu.ec (M.A)
  - <sup>3</sup> Research Group in Polymer Science, Engineering and Sustainability, Esenttia, Mamonal Industrial Zona, km. 8, Cartagena, Colombia; hernandez548@hotmail.com (J. H-F)
  - <sup>4</sup> Department of Natural and Exact Sciences, Universidad de la Costa, Calle 58 # 55 – 66, Barranquilla, Colombia
  - <sup>5</sup> Departamento de Ingeniería Química Industrial y del Medio Ambiente, Escuela Técnica Superior de Ingenieros Industriales, Universidad Politécnica de Madrid (ETSII-UPM), Calle José Gutiérrez Abascal 2, 28006, Spain; m.arrieta@upm.es
  - <sup>6</sup> Grupo de Investigación: Polímeros, Caracterización y Aplicaciones (POLCA), 28006 Madrid, Spain.
- \* Correspondence: crisppavonv@gmail.com (C.P.); Tel.: +34-644343735 (C.P.)

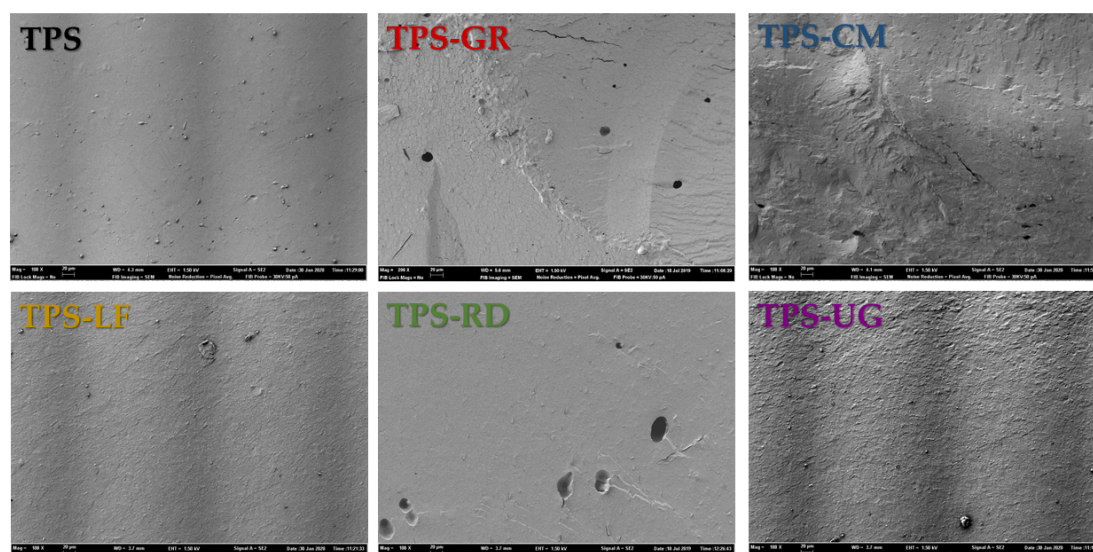

**Figure S1.** Scanning electron microscopy (SEM) images of: (a) TPS, (b) TPS-GR, (c) TPS-CM, (d) TPS-LF, (e) TPS-RD and (f) TPS-UG.

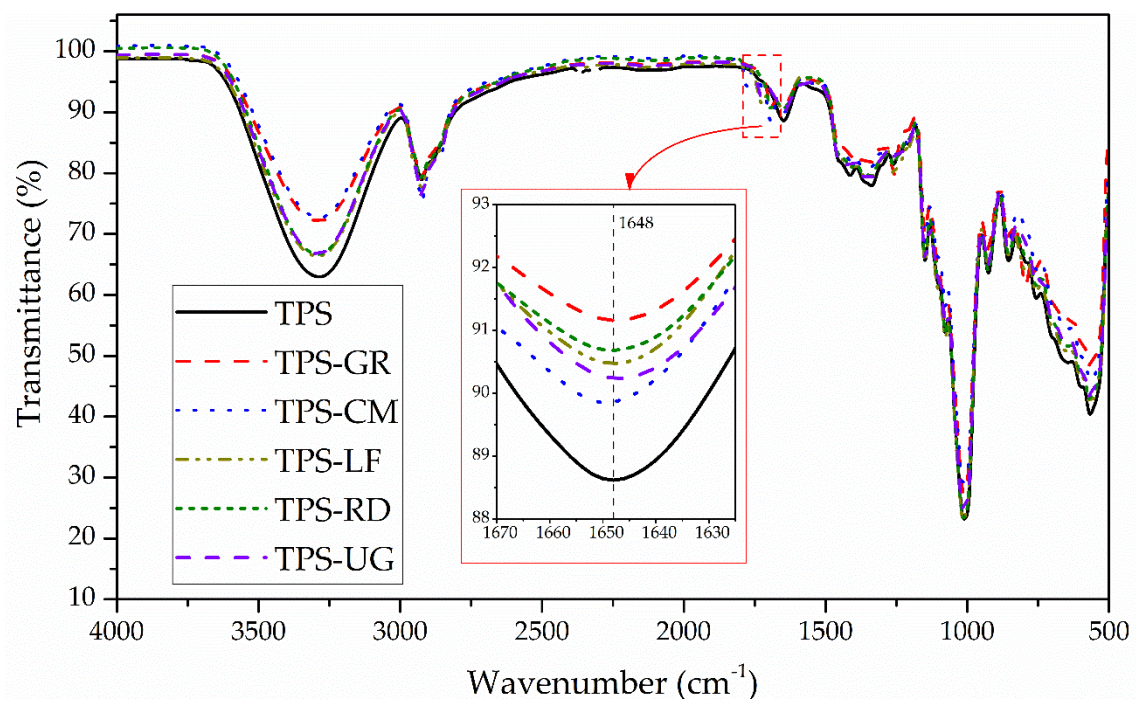

**Figure S2.** Fourier transform infrared spectroscopy (FTIR) spectra of: (a) TPS, (b) TPS-GR, (c) TPS-CM, (d) TPS-LF, (e) TPS-RD and (f) TPS-UG.
